# Supplementary material
Source: PubMed Central journal article supplement (PMC522800)
Supplement: 7600401s2.pdf [file 7600401s2.pdf]

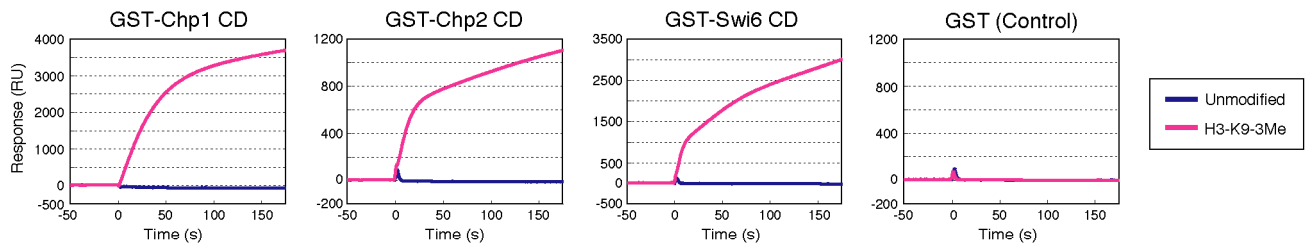

**Supplemental Figure 2** The chromodomain of Chp1, Chp2, or Swi6 directly associates with the histone H3 tail methylated at K9. The association between H3 peptides tri-methylated (H3-K9-3Me) or unmodified (Unmodified) at K9, and the GST-fused chromodomain (CD) of Chp1, Chp2, or Swi6 purified from *E. coli* was analyzed by surface plasmon resonance (SPR).

### **Surface plasmon resonance (SPR)**

Synthesized histone H3 peptides (ARTKQTARKSTGGKAPRKQL) were either unmodified or tri-methylated at Lys9. Each of the peptides was immobilized on a sensor chip and tested for its interaction with recombinant proteins. GST and GST fused with Swi6-, Chp1-, or Chp2-chromodomain were expressed in bacteria (BL21), purified using Glutathione Sepharose according to the manufacturer's directions, and tested for binding to the immobilized histone peptides using a Biacore 3000 instrument.
